# Supplementary material for: Ratiometric detection of Cu2+ in water and drinks using Tb(iii)-functionalized UiO-66-type metal–organic frameworks
Source: Royal Society of Chemistry journal article supplement (doi:10.1039/d3ay00044c), 2023-01-01
Supplement: d3ay00044c1.pdf [file d3ay00044c1.pdf]

## Electronic Supplementary Information

### **Ratiometric detection of Cu<sup>2+</sup> in water and drinks using Tb (III)-functionalized UiO-66-type metal-organic frameworks**

Piaotong Liu, Rusi Hao, Wenliang Sun\*, Junhui Li

*College of Chemical Engineering, Qinghai University, Xining 810016, China*

\*Corresponding author.

*E-mail address:* sunwl3@hotmail.com (W. Sun)

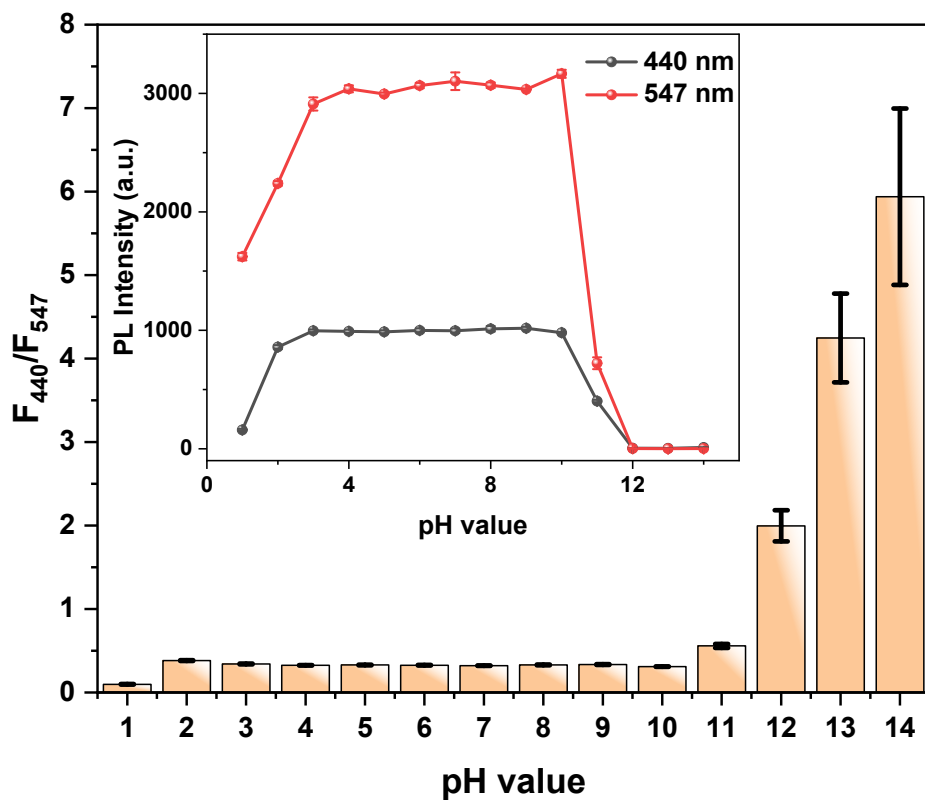

**Fig. S1** Effect of pH on the fluorescence intensity ratio ( $F_{440}/F_{547}$ ) of Tb-UiO-66-DPA.

The inset shows the corresponding fluorescence intensity at 440 nm and 547 nm under different pH values, respectively

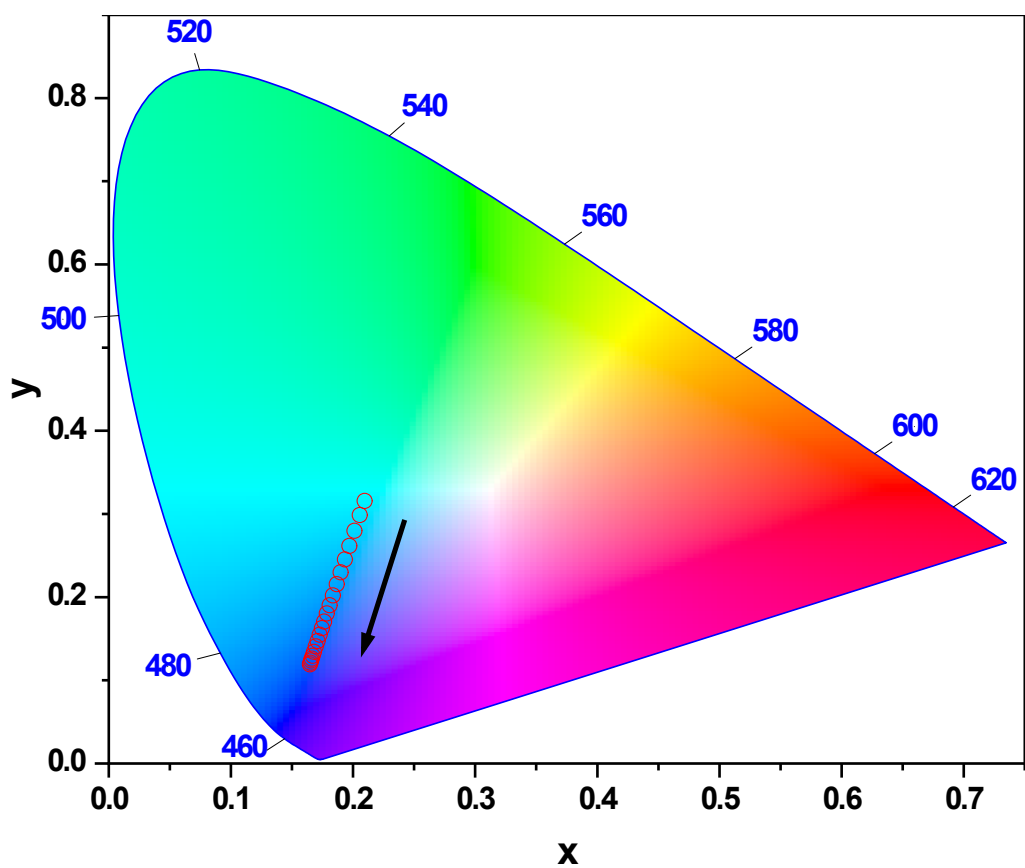

**Fig. S2** CIE chromaticity coordinates of Tb-UiO-66-DPA with 0-10  $\mu\text{M}$   $\text{Cu}^{2+}$  under excitation at 290 nm.

**Table S1.** Comparison of detection performance of proposed Cu<sup>2+</sup> ions fluorescence sensor with others reported in the literatures.

| Probe                                    | Linear range                 | LOD                      | References |
|------------------------------------------|------------------------------|--------------------------|------------|
| Ti <sub>3</sub> C <sub>2</sub> MXene QDs | 2-100 μM                     | 2 μM                     | 1          |
| Hybrid CDs-CdTe QDs                      | 0-100 nM                     | 0.36 nM                  | 2          |
| MOF/CdTe QDs                             | 4.0-40.0 ng·mL <sup>-1</sup> | 0.26 ng·mL <sup>-1</sup> | 3          |
| GSH-Au NCs@ZIF-8                         | 0-5 μM                       | 0.016 μM                 | 4          |
| AuNCs/PQD@SiO <sub>2</sub>               | 0–25 μM, 25–160 μM           | 3 μM                     | 5          |
| BSA -AuNCs                               | 0.5–30 μM                    | 0.1465 μM                | 6          |
| Nano porous organic cages                | 0.1–2 μM                     | 8 nM                     | 7          |
| SPNs-Eu                                  | 2-50 μM                      | 0.29 μM                  | 8          |
| Tb-UiO-66-DPA                            | 0.5–3 μM                     | 113 nM                   | this work  |

## References

1. Q. Guan, J. Ma, W. Yang, R. Zhang, X. Zhang, X. Dong, Y. Fan, L. Cai, Y. Cao, Y. Zhang, N. Li and Q. Xu, *Nanoscale*, 2019, **11**, 14123-14133.
2. Y. Wang, C. Zhang, X. Chen, B. Yang, L. Yang, C. Jiang and Z. Zhang, *Nanoscale*, 2016, **8**, 5977-5984.
3. Y. Yang, W. Liu, J. Cao and Y. Wu, *Food Chem.*, 2020, **328**, 127119.
4. D. Wei, M. Li, Y. Wang, N. Zhu, X. Hu, B. Zhao, Z. Zhang and D. Yin, *J. Hazard. Mater.*, 2023, **441**, 129890.
5. W. Xue, J. Zhong, H. Wu, J. Zhang and Y. Chi, *Analyst*, 2021, **146**, 7545-7553.

6. Y. Niu, T. Ding, J. Liu, G. Zhang, L. Tong, X. Cheng, Y. Yang, Z. Chen and B. Tang, *Talanta*, 2021, **223**, 121745.
7. C. Dai, H.-L. Qian and X.-P. Yan, *J. Hazard. Mater.*, 2021, **416**, 125860.
8. X. Liu, J. Han, X. Wu, D. Pierce and J. X. Zhao, *Sens. Actuators B: Chem.*, 2021, **344**, 130194.
